# Supplementary figures and images for: Induction of potent apoptosis by an anti-CD20 aptamer via the crosslink of membrane CD20 on non-Hodgkin's lymphoma cells
Source: Royal Society of Chemistry journal article supplement (doi:10.1039/c6ra27154e), 2017-01-01

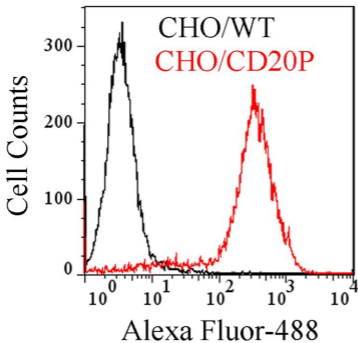

Supplement: c6ra27154e1.pdf [file c6ra27154e1.pdf]
